# Supplementary material for: An Update on the Introduction of New Alien Plant Taxa for Italy and Europe
Source: Preprints.org preprint supplement (doi:10.20944/preprints202402.0150.v1), 2024-02-02
Supplement: Supplementary file 3 [file supplementary]

## Sheet: Records list
Table S1. Record list of new alien taxa for Italian flora.
ID	Taxon	First record or change of status	Italian regions	Status	Family	Period of introduction	Native range	Life form
1	Acacia dealbata Link	First record for Puglia	Puglia	Naturalized	Fabaceae	Neophyte	South East Australia and Tasmania	Scapose phanerophyte
2	Acalypha australis L.	First record for Calabria	Calabria	Casual	Euphorbiaceae	Neophyte	South East China, Japan and Philippines	Scapose therophyte
2	Acalypha australis L.	Change of status for Sicilia: from casual to naturalized	Sicilia	Naturalized	Euphorbiaceae	Neophyte	South East China, Japan and Philippines	Scapose therophyte
3	Acalypha virginica L.	Change of status for Campania: from casual to naturalized	Campania	Naturalized	Euphorbiaceae	Neophyte	East Central U.S.A.	Scapose therophyte
3	Acalypha virginica L.	First record for Sardegna	Sardegna	Casual	Euphorbiaceae	Neophyte	East Central U.S.A.	Scapose therophyte
4	Achillea filipendulina Lam.	First record for Calabria	Calabria	Casual	Asteraceae	Neophyte	South West Asia	Scapose hemicryptophyte
5	Actinidia deliciosa (A.Chev.) C.F.Liang & A.R.Ferguson	First record for Calabria	Calabria	Casual	Actinidiaceae	Neophyte	China	Climbing phanerophyte
6	Aeonium arboreum (L.) Webb & Berthel.	First record for Puglia	Puglia	Casual	Crassulaceae	Archaeophyte	Canary Islands, Morocco	Nanophanerophyte
7	Agave angustifolia Haw. subsp. angustifolia	First record for Calabria	Calabria	Casual	Asparagaceae	Neophyte	Central America and Mexico	Rosulate hemicryptophyte
8	Agave attenuata Salm-Dyck subsp. attenuata	First record for Calabria	Calabria	Casual	Asparagaceae	Neophyte	Mexico	Caespitose phanerophyte
9	Allium cepa L.	First record for Sicilia	Sicilia	Casual	Amaryllidaceae	Archaeophyte	Turkmenistan	Bulbose geophyte
10	Allium tuberosum Rottler ex Spreng.	First record for Sardegna	Sardegna	Casual	Amaryllidaceae	Neophyte	East Asia	Bulbose geophyte
11	Amaranthus emarginatus Salzm. ex Uline & W.L.Bray subsp. emarginatus	Change of status for Campania: from casual to naturalized	Campania	Naturalized	Amaranthaceae	Neophyte	South America	Scapose therophyte
12	Amorpha fruticosa L.	Change of status for Umbria: from naturalized to invasive	Umbria	Invasive	Fabaceae	Neophyte	North America	Caespitose phanerophyte
13	Annona cherimola Mill.	First record for Sicilia	Sicilia	Casual	Annonaceae	Neophyte	South America	Scapose phanerophyte
14	Anredera cordifolia (Ten.) Steenis	Change of status for Campania: from naturalized to invasive	Campania	Invasive	Basellaceae	Neophyte	South America	Rhizomatose geophyte
15	Araujia sericifera Brot.	First record for Basilicata	Basilicata	Casual	Apocynaceae	Neophyte	South America	Climbing phanerophyte
15	Araujia sericifera Brot.	Change of status for Calabria: from casual to naturalized	Calabria	Naturalized	Apocynaceae	Neophyte	South America	Climbing phanerophyte
16	Asparagus setaceus (Kunth) Jessop	First record for Basilicata	Basilicata	Casual	Asparagaceae	Neophyte	East South Africa	Climbing phanerophyte
17	Bauhinia purpurea L.	First record for Italy	Sicilia	Casual	Fabaceae	Neophyte	South Asia	Scapose phanerophyte
18	Bauhinia variegata L.	First record for Europe	Sicilia	Casual	Fabaceae	Neophyte	South Asia	Scapose phanerophyte
19	Begonia semperflorens Cultorum Group	First record for Calabria	Calabria	Casual	Begoniaceae	Neophyte	South America	Bulbose geophyte
20	Bidens aurea (Aiton) Sherff	Extinct in Puglia	Puglia	Extinct	Asteraceae	Neophyte	North Central America	Scapose hemicryptophyte
20	Bidens aurea (Aiton) Sherff	Change of status for Sardegna and for Italy: from naturalized to invasive	Sardegna	Invasive	Asteraceae	Neophyte	North Central America	Scapose hemicryptophyte
21	Bothriochloa laguroides (DC.) Herter	First record for Calabria	Calabria	Casual	Poaceae	Neophyte	America	Caespitose hemicryptophyte
22	Bougainvillea spectabilis Willd.	First record for Calabria	Calabria	Casual	Nyctaginaceae	Neophyte	Brazil	Climbing phanerophyte
23	Broussonetia papyrifera (L.) Vent.	Change of status for Toscana: from naturalized to invasive	Toscana	Invasive	Moraceae	Neophyte	East South Asia	Caespitose phanerophyte
24	Canna glauca L.	First record for Calabria	Calabria	Casual	Cannaceae	Neophyte	America	Rhizomatose geophyte
25	Catalpa speciosa Teas	First record for Toscana	Toscana	Naturalized	Bignoniaceae	Neophyte	U.S.A.	Scapose phanerophyte
26	Cedrus atlantica (Endl.) G.Manetti ex Carrière	Change of status for Toscana: from casual to naturalized	Toscana	Naturalized	Pinaceae	Neophyte	Algeria, Morocco	Scapose phanerophyte
27	Cedrus deodara (Roxb.) G.Don	First record for Lazio	Lazio	Casual	Pinaceae	Neophyte	Central Asia	Scapose phanerophyte
28	Cenchrus longispinus (Hack.) Fernald	First record for Calabria	Calabria	Invasive	Poaceae	Neophyte	Central and North America	Scapose therophyte
29	Cenchrus purpurascens Thunb.	First record for Campania	Campania	Casual	Poaceae	Neophyte	East Asia, Indonesia, Malaysia and Australia	Caespitose hemicryptophyte
30	Chamaecyparis lawsoniana (A.Murray) Parl.	First record for Calabria	Calabria	Casual	Cupressaceae	Neophyte	California and Oregon	Scapose phanerophyte
31	Cicer arietinum L. subsp. arietinum	First record for Sicilia	Sicilia	Casual	Fabaceae	Archaeophyte	Iran, Iraq and Turkey	Scapose therophyte
32	Citrullus amarus Schrad.	First record for Italy	Sardegna	Casual	Cucurbitaceae	Neophyte	South Africa	Scapose therophyte
33	Citrus ×limon (L.) Osbeck	First record for Puglia	Puglia	Casual	Rutaceae	Archaeophyte	China	Scapose phanerophyte
34	Clerodendrum trichotomum Thunb.	First record for Calabria	Calabria	Casual	Lamiaceae	Neophyte	South East Asia	Scapose phanerophyte
35	Coleus scutellarioides (L.) Benth.	First record for Basilicata	Basilicata	Casual	Lamiaceae	Neophyte	East Asia, Indonesia, Malaysia and Australia	Scapose hemicryptophyte
35	Coleus scutellarioides (L.) Benth.	First record for Sicilia	Sicilia	Casual	Lamiaceae	Neophyte	East Asia, Indonesia, Malaysia and Australia	Scapose hemicryptophyte
36	Cucumis melo L. subsp. melo	First record for Calabria	Calabria	Casual	Cucurbitaceae	Archaeophyte	Paleotropical	Scapose therophyte
37	Cycas revoluta Thunb.	First record for Calabria	Calabria	Casual	Cycadaceae	Neophyte	China, Japan and Taiwan	Scapose phanerophyte
38	Cytisus prolifer L.f. subsp. prolifer	First record for Italy	Sardegna	Casual	Fabaceae	Neophyte	Canary Islands	Caespitose phanerophyte
39	Dahlia imperialis Roezl ex Ortgies	First record for Calabria	Calabria	Casual	Asteraceae	Neophyte	Mexico, Central America and Colombia	Caespitose phanerophyte
40	Danaë racemosa (L.) Moench	First record for Sicilia	Sicilia	Casual	Asparagaceae	Neophyte	West Asia	Rhizomatose geophyte
41	Diospyrus lotus L.	First record for Sicilia	Sicilia	Casual	Ebenaceae	Neophyte	Asia	Scapose phanerophyte
42	Diospyrus virginiana L.	First record for Sicilia	Sicilia	Naturalized	Ebenaceae	Neophyte	East Central U.S.A.	Scapose phanerophyte
43	Drosanthemum floribundum (Haw.) Schwantes	First record for Calabria	Calabria	Casual	Aizoaceae	Neophyte	Cape Provinces	Succulent chamaephyte
44	Dysphania pumilio (R.Br.) Mosyakin & Clemants	First record for Calabria	Calabria	Casual	Amaranthaceae	Neophyte	Australia and Tasmania	Scapose therophyte
45	Euphorbia pulcherrima Willd. ex Klotzsch	First record for Calabria	Calabria	Casual	Euphorbiaceae	Neophyte	Mexico and Guatemala	Nanophanerophyte
46	Euphorbia serpens Kunth subsp. serpens	First record for Calabria	Calabria	Casual	Euphorbiaceae	Neophyte	America	Reptant terophyte
47	Evansia japonica (Thunb.) Klatt	First record for Calabria	Calabria	Casual	Iridaceae	Neophyte	South East Asia	Rhizomatose geophyte
48	Fatsia japonica (Thunb.) Decne. & Planch.	First record for Calabria	Calabria	Casual	Araliaceae	Neophyte	Japan and Korea	Caespitose phanerophyte
49	Fragaria ananassa Rozier	First record for Sicilia	Sicilia	Casual	Rosaceae	Neophyte	North America	Reptant hemicryptophyte
50	Gaillardia ×grandiflora Van Houtte	First record for Calabria	Calabria	Casual	Asteraceae	Neophyte	Artificial hybrid	Scapose hemicryptophyte
51	Gazania ×splendens Hend. & Andr.Hend.	First record for Sardegna	Sardegna	Naturalized	Asteraceae	Neophyte	Artificial hybrid	Scapose hemicryptophyte
52	Gibasis pellucida (M.Martens & Galeotti) D.R.Hunt	First record for Calabria	Calabria	Casual	Commelinaceae	Neophyte	Central America and Mexico	Scapose therophyte
53	Glycine max (L.) Merr.	First record for Campania	Campania	Casual	Fabaceae	Neophyte	Central and East Asia	Scapose therophyte
54	Grevillea robusta A.Cunn. ex R.Br.	First record for Calabria	Calabria	Casual	Proteaceae	Neophyte	East Australia	Scapose phanerophyte
55	Helianthus tuberosus L.	Change of status for Sardegna: from naturalized to invasive	Sardegna	Invasive	Asteraceae	Neophyte	North America	Bulbose geophyte
56	Impatiens balsamina L.	First record for Calabria	Calabria	Casual	Balsaminaceae	Neophyte	India and Sri Lanka	Scapose therophyte
57	Isatis tinctoria L. subsp. tinctoria	Change of status for Puglia: from invasive to naturalized	Puglia	Naturalized	Brassicaceae	Archaeophyte	East Europe and Turkey	Biennial hemicryptophyte
58	Jaborosa integrifolia Lam.	Change of status for Sardegna and for Italy: from naturalized to invasive	Sardegna	Invasive	Solanaceae	Neophyte	South America	Rhizomatose geophyte
59	Jacaranda mimosifolia D.Don	First record for Calabria	Calabria	Casual	Bignoniaceae	Neophyte	South America	Scapose phanerophyte
60	Kerria japonica (L.) DC.	First record for Calabria	Calabria	Casual	Rosaceae	Neophyte	China, Japan and Korea	Caespitose phanerophyte
61	Lampranthus roseus (Willd.) Schwantes	First record for Calabria	Calabria	Casual	Aizoaceae	Neophyte	Cape Provinces	Succulent chamaephyte
62	Lantana montevidensis (Spreng.) Briq.	First record for Basilicata	Basilicata	Casual	Verbenaceae	Neophyte	South America	Nanophanerophyte
62	Lantana montevidensis (Spreng.) Briq.	Change of status for Calabria and for Italy: from casual to naturalized	Calabria	Naturalized	Verbenaceae	Neophyte	South America	Nanophanerophyte
63	Leucaena leucocephala (Lam.) de Wit subsp. glabrata (Rose) Zárate	Change of status for Calabria and for Italy: from naturalized to invasive	Calabria	Invasive	Fabaceae	Neophyte	Central America and Mexico	Scapose phanerophyte
64	Lobelia erinus L.	First record for Calabria	Calabria	Casual	Campanulaceae	Neophyte	Central e South Africa	Scapose therophyte
64	Lobelia erinus L.	First record for Molise	Molise	Casual	Campanulaceae	Neophyte	Central e South Africa	Scapose therophyte
65	Lycium barbarum L.	First record for Calabria	Calabria	Casual	Solanaceae	Neophyte	China	Nanophanerophyte
66	Melia azedarach L	Change of status for Calabria and for Italy: from naturalized to invasive	Calabria	Invasive	Meliaceae	Neophyte	South Asia, Malaisia, Indonesia and Australia	Scapose phanerophyte
67	Moeroris tenella (Roxb.) R.W.Bouman	First record for Sardegna	Sardegna	Casual	Phyllanthaceae	Neophyte	East Africa and Madagascar	Scapose therophyte
68	Momordica charantia L.	First record for Sardegna	Sardegna	Casual	Cucurbitaceae	Neophyte	Paleotropical	Scandense therophyte
69	Myoporum laetum G.Forst.	First record for Sicilia	Sicilia	Casual	Scrophulariaceae	Neophyte	New Zealand	Caespitose phanerophyte
70	Nassella neesiana (Trin. & Rupr.) Barkworth	Change of status for Liguria: from casual to naturalized	Liguria	Naturalized	Poaceae	Neophyte	South America	Caespitose hemicryptophyte
71	Nerium oleander L. subsp. oleander cultivar ‘Pink Beauty’	First record for Apulia	Puglia	Casual	Apocynaceae	Neohyte	Mediterranean basin and South Asia	Phanerophytes caespitose
72	Ocimum basilicum L.	First record for Calabria	Calabria	Casual	Lamiaceae	Archaeophyte	South East Asia, Malaisia, Indonesia and Australia	Scapose therophyte
73	Oenothera gaura W.L.Wagner & Hoch	First record for Sardegna	Sardegna	Casual	Onagraceae	Neophyte	North America	Biennial hemicryptophyte
74	Oenothera stucchii Soldano	First record for Puglia	Puglia	Naturalized	Onagraceae	Neophyte	North America	Biennial hemicryptophyte
75	Paspalum exaltatum J.Presl	Change of status for Liguria and for Italy: from casual to naturalized	Liguria	Naturalized	Poaceae	Neophyte	South America	Caespitose hemicryptophyte
76	Perilla frutescens (L.) Britton	First record for Calabria	Calabria	Casual	Lamiaceae	Neophyte	East and South Asia	Scapose therophyte
77	Persicaria capitata (Buch.-Ham. ex D.Don.) H.Gross	First record for Basilicata	Basilicata	Casual	Polygonaceae	Neophyte	South Asia	Reptant hemicryptophyte
77	Persicaria capitata (Buch.-Ham. ex D.Don.) H.Gross	Change of status for Calabria: from casual to naturalized	Calabria	Naturalized	Polygonaceae	Neophyte	South Asia	Reptant hemicryptophyte
78	Persicaria senegalensis (Meisn.) Soják	First record for Continental Europe	Calabria	Naturalized	Polygonaceae	Neophyte	Africa, Madagascar and Arabian peninsula	Scapose therophyte
79	Petroselinum crispum (Mill.) Fuss	Change of status for Puglia: from casual to naturalized	Puglia	Naturalized	Apiaceae	Archaeophyte	Algeria, Greece, Morocco and Yugoslavia	Biennial hemicryptophyte
80	Phoenix canariensis H.Wildpret	Change of status for Calabria: from casual to naturalized	Calabria	Naturalized	Arecaceae	Neophyte	Canary Islands	Scapose phanerophyte
81	Phyllostachys aurea Carrière ex Rivière & C.Rivière	First record for Basilicata	Basilicata	Casual	Poaceae	Neophyte	China and Vietnam	Caespitose phanerophyte
81	Phyllostachys aurea Carrière ex Rivière & C.Rivière	Change of status for Puglia: from casual to naturalized	Puglia	Naturalized	Poaceae	Neophyte	China and Vietnam	Caespitose phanerophyte
81	Phyllostachys aurea Carrière ex Rivière & C.Rivière	First record for Trentino Alto Adige	Trentino Alto Adige	Casual	Poaceae	Neophyte	China and Vietnam	Caespitose phanerophyte
82	Physalis peruviana L.	First record for Basilicata	Basilicata	Casual	Solanaceae	Neophyte	Bolivia and Brazil	Scapose hemicryptophyte
83	Pinus elliottii Engelm.	First record for Europe	Sardegna	Casual	Pinaceae	Neophyte	South East U.S.A.	Scapose phanerophyte
84	Polanisia dodecandra (L.) DC. subsp. trachysperma (Torr. & A.Gray) Iltis	Change of status for Toscana and for Italy: from naturalized to invasive	Toscana	Invasive	Cleomaceae	Neophyte	North America	Scapose therophyte
84	Polanisia dodecandra (L.) DC. subsp. trachysperma (Torr. & A.Gray) Iltis	First record for Umbria	Umbria	Naturalized	Cleomaceae	Neophyte	North America	Scapose therophyte
85	Portulacaria afra Jacq.	First record for Peninsular Italy	Calabria	Casual	Didiereaceae	Neophyte	Kenya, Monzambique and South Africa	Succulent phanerophyte
86	Punica granatum L.	Change of status for Calabria: from casual to naturalized	Calabria	Naturalized	Lythraceae	Archaeophyte	West Asia	Scapose phanerophyte
87	Reynoutria bohemica Chrtek & Chrtková	Change of status for Liguria: from casual to naturalized	Liguria	Naturalized	Polygonaceae	Neophyte	Japan	Rhizomatose geophyte
88	Robinia pseudoacacia L.	Change of status for Sardegna: from naturalized to invasive	Sardegna	Invasive	Fabaceae	Neophyte	East South U.S.A.	Scapose phanerophyte
89	Ruellia simplex C.Wright	First record for Calabria	Calabria	Casual	Acanthaceae	Neophyte	America	Nanophanerophyte
90	Salvia ×floriferior Dolat. & Ziel.	First record for Calabria	Calabria	Casual	Lamiaceae	Neophyte	Artificial hybrid	Scapose hemicryptophyte
91	Soehrensia spachiana (Lem.) Schlumpb.	First record for Calabria	Calabria	Casual	Cactaceae	Neophyte	Argentina and Bolivia	Succulent chamaephyte
92	Solanum pseudocapsicum L.	First record for Calabria	Calabria	Casual	Solanaceae	Neophyte	South America	Nanophanerophyte
93	Sorghum bicolor (L.) Moench subsp. bicolor	First record for Calabria	Calabria	Casual	Poaceae	Neophyte	Central Africa	Scapose therophyte
94	Sorghum halepense (L.) Pers.	Change of status for Umbria : from casual to invasive	Umbria	Invasive	Poaceae	Archaeophyte	North Africa, Arabian peninsula and Central South Asia	Rhizomatose geophyte
95	Spinacia oleracea L. subsp. oleracea	First record for Sicilia	Sicilia	Casual	Amaranthaceae	Archaeophyte	Kazakhstan, Turkmenistan and Uzbekistan	Scapose therophyte
96	Stenotaphrum secundatum (Walter) Kuntze	Change of status for Sicilia: from casual to naturalized	Sicilia	Naturalized	Poaceae	Neophyte	Central and South America, East U.S.A., Central West Africa	Rhizomatose geophyte
97	Styphnolobium japonicum (L.) Schott	First record for Calabria	Calabria	Casual	Fabaceae	Neophyte	China	Scapose phanerophyte
98	Tecoma stans (L.) Juss. ex Kunth	First record for Sardegna	Sardegna	Casual	Bignoniaceae	Neophyte	America	Caespitose phanerophyte
99	Tradescantia pallida (Rose) D.R.Hunt	First record for Basilicata	Basilicata	Casual	Commelinaceae	Neophyte	Mexico	Rhizomatose geophyte
100	Triticum aestivum L. subsp. spelta (L.) Thell.	First record for Sardegna	Sardegna	Casual	Poaceae	Archaeophyte	Transcaucasus	Scapose therophyte
101	Triticum turgidum L. subsp. dicoccon (Schrank ex Schübl.) Thell.	First record for Sardegna	Sardegna	Casual	Poaceae	Archaeophyte	Turkey	Scapose therophyte
102	Ulmus pumila L.	First record for Umbria	Umbria	Casual	Ulmaceae	Neophyte	Central Asia	Caespitose phanerophyte
103	Vicia lens (L.) Coss. & Germ. subsp. lens	First record for Sicilia	Sicilia	Casual	Fabaceae	Archaeophyte	South West Asia	Scapose therophyte
104	Vitis riparia Michx.	First record for Umbria	Umbria	Casual	Vitaceae	Neophyte	North America	Climbing phanerophyte
105	Yucca gigantea Lem.	First record for Sardegna	Sardegna	Casual	Asparagaceae	Neophyte	Central America and Mexico	Caespitose phanerophyte
106	Zinnia elegans Jacq.	First record for Calabria	Calabria	Casual	Asteraceae	Neophyte	Central America and Mexico	Scapose therophyte
